# Supplementary material for: Surface phosphorization for the enhanced photoelectrochemical performance of an Fe2O3/Si photocathode
Source: Royal Society of Chemistry journal article supplement (doi:10.1039/d2nr02693g), 2022-01-01
Supplement: d2nr02693g1.pdf [file d2nr02693g1.pdf]

# Supporting Information

## Surface Phosphorization for Enhanced Photoelectrochemical Performance of Fe<sub>2</sub>O<sub>3</sub>/Si Photocathode

Yanqi Yuan<sup>1</sup>, Boan Zhong<sup>1</sup>, Feng Li<sup>1</sup>, Hongmei Wu<sup>1</sup>, Jing Liu<sup>1,2,\*</sup>, Haiyan Yang<sup>2,3</sup>,  
Liping Zhao<sup>1</sup>, Yanting Sun<sup>4</sup>, Peng Zhang<sup>1,2,\*</sup>, Lian Gao<sup>1</sup>

<sup>1</sup> School of Materials Science and Engineering, Shanghai Jiao Tong University, 800  
Dongchuan Road, Shanghai 200240, China

<sup>2</sup> Shanghai Key Laboratory of Hydrogen Science, Shanghai 200240, China

<sup>3</sup> Center of Hydrogen Science, Shanghai Jiao Tong University, Shanghai 200240, China

<sup>4</sup> Department of Applied Physics, KTH-Royal Institute of Technology, Hannes Alfvéns  
väg 12, 11419 Stockholm, Sweden

\* Corresponding authors: E-mail: liujing2014@sjtu.edu.cn,  
pengzhang2010@sjtu.edu.cn

**KEYWORDS:** photoelectrocatalysis, surface modification, FePi co-catalyst,  
Hematite, photocathode



Figure S1. XRD pattern of FePi/Fe<sub>2</sub>O<sub>3</sub>/p-Si-250 and FePi/Fe<sub>2</sub>O<sub>3</sub>/p-Si-350



Figure S2. SEM images of (a) FePi/Fe<sub>2</sub>O<sub>3</sub>/p-Si-250, (b) FePi/Fe<sub>2</sub>O<sub>3</sub>/p-Si-350 and (c-d) corresponding cross-section images.



Figure S3. AFM images of (a)  $\text{Fe}_2\text{O}_3/\text{p-Si}$ , (b)  $\text{FePi}/\text{Fe}_2\text{O}_3/\text{p-Si-250}$ , (c)  $\text{FePi}/\text{Fe}_2\text{O}_3/\text{p-Si}$  and (d)  $\text{FePi}/\text{Fe}_2\text{O}_3/\text{p-Si-350}$ .



Figure S4. Si 2p spectra obtained from the surface (a) of  $\text{Fe}_2\text{O}_3/\text{p-Si}$  and (b)  $\text{FePi}/\text{Fe}_2\text{O}_3/\text{p-Si}$ .



Figure S5. The atomic ratio of Fe and P obtained from XPS surface (II) and depth profiling measurement (III) of  $\text{FePi}/\text{Fe}_2\text{O}_3/\text{p-Si}$



Figure S6. Faradic efficiency of FePi/Fe<sub>2</sub>O<sub>3</sub>/p-Si measured by the volume of H<sub>2</sub> produced at constant current density of -10 mA cm<sup>-2</sup> in 2 hours.



Figure S7. (a) Chopped LSVs of FePi/Fe<sub>2</sub>O<sub>3</sub>/p-Si-250, FePi/Fe<sub>2</sub>O<sub>3</sub>/p-Si and FePi/Fe<sub>2</sub>O<sub>3</sub>/p-Si-350 in 1M KOH under illumination; (b) Nyquist plots of FePi/Fe<sub>2</sub>O<sub>3</sub>/p-Si-250, FePi/Fe<sub>2</sub>O<sub>3</sub>/p-Si and FePi/Fe<sub>2</sub>O<sub>3</sub>/p-Si-350 at 200 mV<sub>RHE</sub> in 1M KOH, the inset is the enlarged view of curves at high frequency;



Figure S8. Transmittance of p-Si, Fe<sub>2</sub>O<sub>3</sub>/p-Si and FePi/Fe<sub>2</sub>O<sub>3</sub>/p-Si in the range from 300 to 1000 nm

Table S1. A survey on the PEC performance based on recent reports of Si-based photocathode

| Photocathode                                | Substrate             | Electrolyte                           | Onset potential (mV <sub>RHE</sub> ) | $j_0$ (at 0 V <sub>RHE</sub> ) (mA cm <sup>-2</sup> ) | Saturated current density (mA cm <sup>-2</sup> ) | Ref.      |
|---------------------------------------------|-----------------------|---------------------------------------|--------------------------------------|-------------------------------------------------------|--------------------------------------------------|-----------|
| FePi/Fe <sub>2</sub> O <sub>3</sub> /p-Si   | Planar Si             | 1 M KOH                               | 390                                  | -11.9                                                 | -20                                              | This work |
| Fe <sub>2</sub> O <sub>3</sub> /p-Si        | Planar Si             | 1 M KOH                               | 189                                  | -1.3                                                  | -26.5                                            | This work |
| Fe <sub>2</sub> O <sub>3</sub> /p-Si        | Planar Si             | 1M NaOH                               | 250                                  | -0.75                                                 | -34                                              | 1         |
| SiMP/Fe <sub>2</sub> O <sub>3</sub>         | p-type Si micropillar | 0.5M NaSO <sub>4</sub>                | 200                                  | -0.02                                                 | -0.65                                            | 2         |
| Ni/p-Si                                     | Planar Si             | 0.5 M H <sub>2</sub> SO <sub>4</sub>  | 110                                  | 5.57                                                  | -30                                              | 3         |
| Si/TiO <sub>2</sub> /Co                     | Planar Si             | 0.5 M Na <sub>2</sub> SO <sub>4</sub> | 320                                  | -0.7                                                  | -                                                | 4         |
| Si/C <sub>N</sub> /TiO <sub>2</sub> /NiCo P | Etched Si             | 1 M KOH                               | 420                                  | -19.87                                                | -22.5                                            | 5         |
| Si <sub>PN</sub> /CN/MoS <sub>x</sub>       | Micro-pyramid Si      | 0.5 M H <sub>2</sub> SO <sub>4</sub>  | 230                                  | -10                                                   | -                                                | 6         |
| MoO <sub>x</sub> /p-Si                      | Planar Si             | 0.5 M H <sub>2</sub> SO <sub>4</sub>  | -                                    | 0                                                     | -30                                              | 7         |
| Si-NiS                                      | Si NW array           | 1 M KOH                               | 200                                  | -12                                                   | -25                                              | 8         |

Table S2. The resistance values and CPE obtained from the deconvolution of the EIS Spectra

|                                                    | <b>Rs/Ohm</b> | <b>CPE1*E-6/F</b><br><b>s<sup>(a-1)</sup></b> | <b>Rct1/Ohm</b> | <b>CPE2*E-6/F</b><br><b>s<sup>(a-1)</sup></b> | <b>Rct2/Ohm</b> |
|----------------------------------------------------|---------------|-----------------------------------------------|-----------------|-----------------------------------------------|-----------------|
| p-Si                                               | 16.88         | 2.85 (n=0.96)                                 | 6853            | -                                             | -               |
| Fe <sub>2</sub> O <sub>3</sub> /p-Si               | 12.38         | 9.28 (n=0.78)                                 | 3459            | -                                             | -               |
| FePi/ Fe <sub>2</sub> O <sub>3</sub> /p-Si-<br>250 | 11.92         | 0.12 (n=0.85)                                 | 528.2           | 13.19 (n=0.71)                                | 10.96           |
| FePi/ Fe <sub>2</sub> O <sub>3</sub> /p-Si         | 13.42         | 67.58 (n=0.67)                                | 188.3           | 31.38 (n=0.84)                                | 35.57           |
| FePi/ Fe <sub>2</sub> O <sub>3</sub> /p-Si-<br>350 | 16.51         | 6.34 (n=0.83)                                 | 306.4           | 1499 (n=0.72)                                 | 833.9           |

Table S3. The calculated Gibbs free energy of the adsorption energies of H\* on several different sites of the (001) surface for Fe<sub>2</sub>O<sub>3</sub>-FePi hereto-structure surfaces.

| <b>H location sites</b>    | H-Fe  | H-O1  | H-O2  | H-P   |
|----------------------------|-------|-------|-------|-------|
| $\Delta G_{H^*}/\text{eV}$ | 0.126 | 0.457 | 1.510 | 0.458 |

## REFERENCES

1. S. Li, P. Zhang, X. Xie, X. Song, J. Liu, L. Zhao, H. Chen and L. Gao, *Applied Catalysis B: Environmental*, 2017, **200**, 372-377.
2. J. Gu, H. Yu, X. Quan and S. Chen, *Frontiers of Environmental Science & Engineering*, 2017, **11**.
3. W. Zhou, F. Niu, S. S. Mao and S. Shen, *Applied Catalysis B: Environmental*, 2018, **220**, 362-366.
4. C. Nie, C. Liu, L. Gong and M. Wang, *Journal of Materials Chemistry A*, 2021, **9**, 234-238.
5. X. Sun, C. Liu, P. Zhang, L. Gong and M. Wang, *Journal of Power Sources*, 2021, **484**.
6. S. Zhang, H. Zhao, X. Li, Y. Li, Y. Jin, X. Liu, G. Shi and P. K. Wong, *Applied Catalysis B: Environmental*, 2022, **300**.
7. I.-H. Yoo, Y.-J. Lee, S. S. Kalanur and H. Seo, *Applied Catalysis B: Environmental*, 2020, **264**.
8. J. Yoo, I. H. Kwak, I. S. Kwon, K. Park, D. Kim, J. H. Lee, S. A. Lim, E. H. Cha and J. Park, *Journal of Materials Chemistry C*, 2020, **8**, 3240-3247.
